# Supplementary material
Source: PubMed Central journal article supplement (PMC4206538)
Supplement: auto-10-1603-s01.pdf [file auto-10-1603-s01.pdf]

## **Supplemental Material to:**

**Melania Minoia, Alessandra Boncoraglio, Jonathan Vinet,  
Federica F Morelli, Jeanette F Brunsting, Angelo Poletti,  
Sabine Krom, Eric Reits, Harm H Kampinga,  
and Serena Carra**

**BAG3 induces the sequestration of proteasomal clients  
into cytoplasmic puncta: Implications for a proteasome-  
to-autophagy switch**

**Autophagy 2014; 10(9)**

**<http://dx.doi.org/10.4161/auto.29409>**

**[www.landesbioscience.com/journals/autophagy/article/29409](http://www.landesbioscience.com/journals/autophagy/article/29409)**

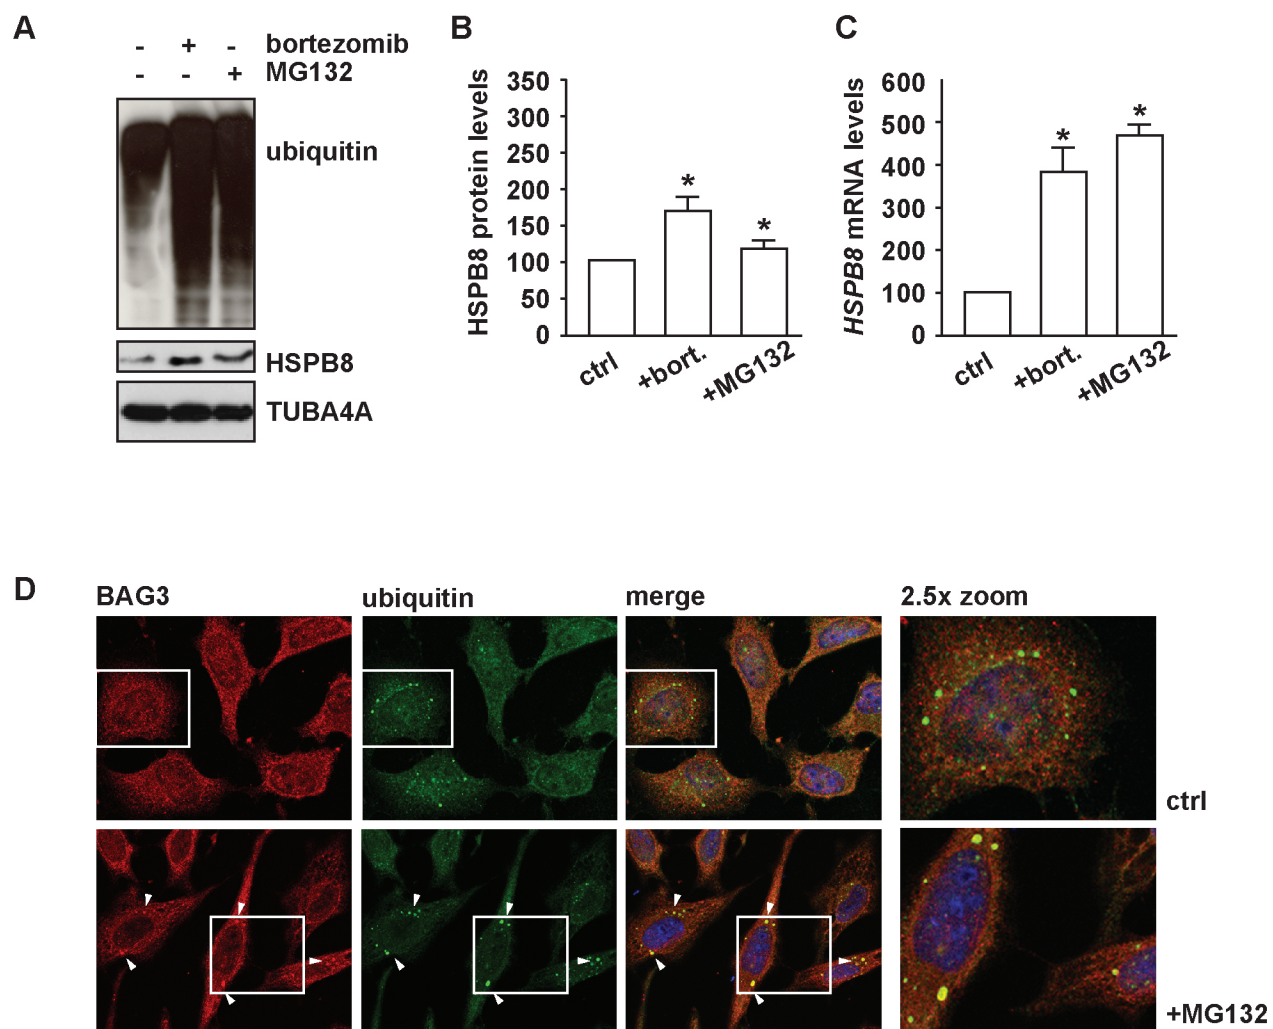

Figure S1

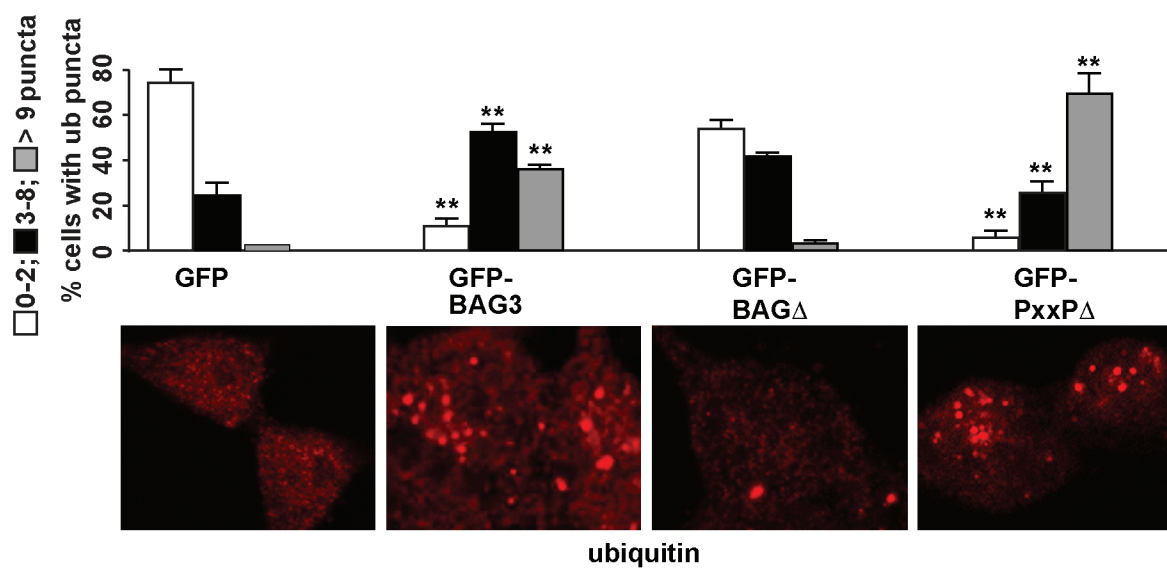

Figure S2

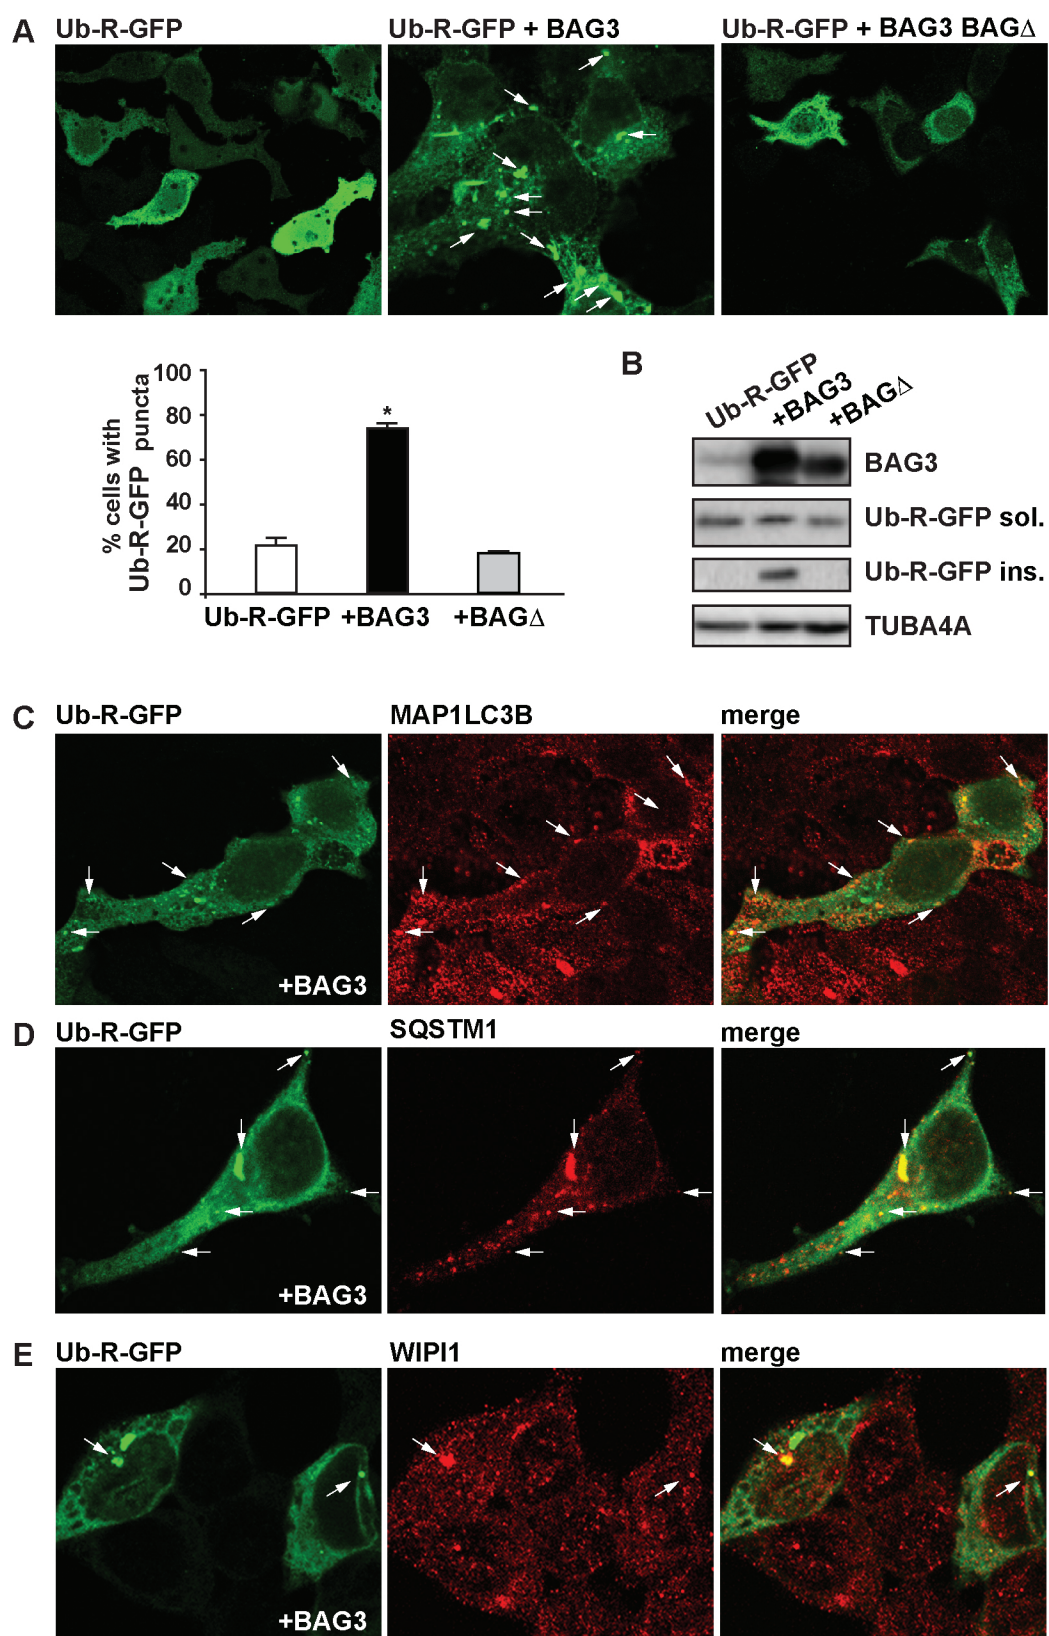

Figure S3

**Figure S1.** HSPB8 is induced upon proteasome inhibition. (A–C) HEK293T cells were either left untreated or treated with 20  $\mu$ M MG132 for 5 h or 100 nM bortezomib overnight. Total proteins (A and B) or mRNA (C) were extracted and HSPB8 protein or mRNA levels were measured ( $*P < 0.05$  compared to control;  $n > 3$  independent samples  $\pm$  sem). (D) HeLa cells were treated for 5 h with 20  $\mu$ M MG132 and cells were fixed with 100% methanol. Subcellular distribution of endogenous BAG3 and ubiquitin was investigated by immunofluorescence using specific antibodies.

**Figure S2.** BAG3 induces sequestration of ubiquitin into cytoplasmic puncta. HEK293T cells were transfected with GFP, GFP-BAG3, GFP-BAG $\Delta$  or GFP-PxxP $\Delta$  encoding vectors. 48 h post-transfection cells were fixed with 100% methanol for 10 min at  $-20^{\circ}\text{C}$  and subjected to immunofluorescence to investigate ubiquitin subcellular distribution. Immunofluorescence pictures show accumulation of ubiquitin in cytoplasmic puncta in cells expressing GFP-BAG3 and GFP-PxxP $\Delta$ . The percentage of cells containing ubiquitin-positive cytoplasmic puncta is depicted ( $**P < 0.001$  compared to GFP;  $n = 3$  to 4 independent samples  $\pm$  sem).

**Figure S3.** BAG3 sequesters the proteasomal reporter Ub-R-GFP into cytoplasmic insoluble puncta that colocalize with SQSTM1 and canonical autophagy markers. (A) HEK293T cells were transfected with a Ub-R-GFP encoding vector and either an empty vector or His-tagged FL BAG3 or BAG $\Delta$  encoding vectors. Cells were fixed 24 h post-transfection. The percentage of cells containing Ub-R-GFP positive cytoplasmic puncta is depicted ( $**P < 0.001$  compared to empty vector;  $n = 3$  to 4 independent samples  $\pm$  sem). (B) NP-40 soluble and insoluble proteins were fractionated and accumulation of Ub-R-GFP in both fractions was analyzed by western blotting. (C–E) HEK293T cells were transfected with Ub-R-GFP and BAG3 encoding vectors and subjected,

25 24 h post-transfection, to immunofluorescence to investigate Ub-R-GFP colocalization with  
26 MAP1LC3B (C), SQSTM1 (D) and WIPI1 (E).
